# Supplementary material
Source: Research Square preprint supplement (doi:10.21203/rs.3.rs-10173830/v1)
Supplement: Supplementary file 1 [file e2f4496242fa3eec9ed7f939.docx]

**Supplementary Information-I**

## Machine Learning Method Selection

Thirteen machine learning algorithms, including linear, probabilistic, distance-based, tree-based, ensemble, margin-based, and neural network classifiers, were evaluated to investigate the determinants of willingness to pay (WTP) for sustainable arsenic mitigation technologies. The models were selected to represent diverse analytical paradigms capable of capturing both linear and non-linear relationships among socio-economic, behavioral, and institutional predictors. Model implementation details, key hyperparameters, and validation strategies are summarized in Table S1. All analyses were conducted in Python using the Scikit-learn framework. Hyperparameter tuning was performed using cross-validation where applicable, and model performance was evaluated using an independent test dataset.

**Table S1. Summary of machine learning models and implementation settings used in this study.**

| **Category** | **Model** | **Rationale for Inclusion** | **Key Hyperparameters** | **Validation Strategy** | **Reference** |
| --- | --- | --- | --- | --- | --- |
| Linear | Logistic Regression (LR) | Provides an interpretable benchmark for quantifying the influence of socio-economic, behavioral, and institutional variables on WTP decisions. | Penalty, C | Cross-validation | ([Hosmer Jr et al., 2013](#_ENREF_6)) |
| Linear | Logistic Regression with Cross-Validation (LRCV) | Evaluates whether regularization and automated parameter tuning improve the robustness and generalizability of WTP prediction. | Penalty, CV folds | Internal CV | ([Hosmer Jr et al., 2013](#_ENREF_6)) |
| Probabilistic | Gaussian Naïve Bayes (GNB) | Serves as a computationally efficient probabilistic baseline for estimating household WTP based on conditional probability relationships among predictors. | Default settings | Train-test split | ([Zhang, 2004](#_ENREF_12)) |
| Distance-Based | K-Nearest Neighbors (KNN) | Assesses whether households with similar socio-economic and behavioral characteristics exhibit similar WTP behavior. | k neighbors | Train-test split | ([Peterson, 2009](#_ENREF_8)) |
| Tree-Based | Decision Tree (DT) | Identifies hierarchical and rule-based decision structures underlying household WTP behavior. | max_depth, min_samples_split | Train-test split | ([Quinlan, 1986](#_ENREF_9)) |
| Ensemble | Bagging | Reduces prediction variance and improves model stability in heterogeneous household datasets. | n_estimators | Cross-validation | ([Breiman, 1996](#_ENREF_1)) |
| Ensemble | Random Forest (RF) | Captures complex interactions and non-linear relationships while improving predictive robustness by aggregating multiple decision trees. | n_estimators, max_depth | Cross-validation | ([Breiman, 2001](#_ENREF_2); [Pedregosa et al., 2011](#_ENREF_7)) |
| Ensemble | AdaBoost (AB) | Evaluates whether sequential learning can improve classification by focusing on households that are difficult to classify. | n_estimators, learning_rate | Cross-validation | ([Freund and Schapire, 1997](#_ENREF_4)) |
| Ensemble | Gradient Boosting (GB) | Captures complex non-linear patterns and incremental improvements in prediction by sequentially correcting model errors. | n_estimators, learning_rate | Cross-validation | ([Friedman, 2001](#_ENREF_5)) |
| Margin-Based | Linear Support Vector Classifier (LSVC) | Identifies optimal linear decision boundaries in high-dimensional socio-economic and behavioral datasets. | C | Train-test split | ([Cortes and Vapnik, 1995](#_ENREF_3)) |
| Margin-Based | Support Vector Classifier (SVC) | Models’ non-linear decision boundaries using kernel transformations to capture complex interactions among predictors. | Kernel, C, gamma | Train-test split | ([Cortes and Vapnik, 1995](#_ENREF_3)) |
| Margin-Based | Nu-Support Vector Classifier (NuSVC) | Evaluates non-linear and heterogeneous decision boundaries while providing greater flexibility in controlling model complexity. | Nu, kernel, gamma | Train-test split | ([Schölkopf et al., 2000](#_ENREF_11)) |
| Neural Network | Multi-Layer Perceptron (MLP) | Captures higher-order interactions and complex non-linear relationships that traditional statistical models may not adequately represent. | Hidden layers, activation, learning rate | Cross-validatio | ([Rumelhart et al., 1986](#_ENREF_10)) |

# **REFERENCES**

Breiman, L., 1996. Bagging predictors. Machine learning. 24**,** 123-140.

Breiman, L., 2001. Random forests. Machine learning. 45**,** 5-32.

Cortes, C., Vapnik, V., 1995. Support-vector networks. Machine learning. 20**,** 273-297.

Freund, Y., Schapire, R. E., 1997. A decision-theoretic generalization of on-line learning and an application to boosting. Journal of computer and system sciences. 55**,** 119-139.

Friedman, J. H., 2001. Greedy function approximation: a gradient boosting machine. Annals of statistics. 1189-1232.

Hosmer Jr, D. W., et al., 2013. Applied logistic regression. John Wiley & Sons.

Pedregosa, F., et al., 2011. Scikit-learn: Machine learning in Python. the Journal of machine Learning research. 12**,** 2825-2830.

Peterson, L. E., 2009. K-nearest neighbor. Scholarpedia. 4**,** 1883.

Quinlan, J. R., 1986. Induction of decision trees. Machine learning. 1**,** 81-106.

Rumelhart, D. E., et al., 1986. Learning representations by back-propagating errors. nature. 323**,** 533-536.

Schölkopf, B., et al., 2000. New support vector algorithms. Neural computation. 12**,** 1207-1245.

Zhang, H., 2004. The optimality of naive Bayes. Aa. 1**,** 3.
